# Supplementary material for: Functional Genomics with a Comprehensive Library of Transposon Mutants for the Sulfate-Reducing Bacterium Desulfovibrio alaskensis G20
Source: PubMed Central journal article supplement — mBio. 2014 May 27;5(3):e01041-14. doi: 10.1128/mBio.01041-14 (PMC4045070; doi:10.1128/mbio.01041-14), 2014-05-27
Supplement: mbo003141845st1.pdf [file mbo003141845st1.pdf]

Table S1. Primers used in this study.

| Primer name    | Sequence                                            | Usage                                             |
|----------------|-----------------------------------------------------|---------------------------------------------------|
| pMO9075-SLIC-F | CAAGGATCTGATGGCGCAGGG                               | complementation                                   |
| pMO9075-SLIC-R | CTGGGACTGCATTGCAGGGCTTCCCAACCT                      | complementation                                   |
| JK2_Dde3007_F  | GCAATGCAGTCCCAGGAGGTACCATATGTCCCGTTACAAAGTGAACAAAA  | complementation                                   |
| JK2_Dde3007_R  | GATCGTGATCCCCTGCGCCATCAGATCCTTGAGTTCTGCAGTGACGGCTTT | complementation                                   |
| pRL27_IE_rev1  | ACTGAGAAGCCCTTAGAGCC                                | mutant confirmation, transposon insertion mapping |
| 134G07_up      | TACCTGTCCTTTCAGCTGCC                                | JK08988 mutant confirmation                       |
| 48C10_down     | TCACCCATATTGAACGGAGC                                | JK03141 mutant confirmation                       |
| 6H8_up         | GAAAATAGTGCCTGGTGCAG                                | JK00494 mutant confirmation                       |
| 25B06_down     | GCTCTGTTGCGGTATTCTCC                                | JK01512 mutant confirmation                       |
| 39D8_down      | CCAGCACCAGATACCCTGTT                                | JK02520 mutant confirmation                       |
| 169E7_down     | AGGTTGTTTCTGTGGTTCCG                                | JK11239 mutant confirmation                       |
| 77E07_down     | ATAGCCTGCTTCTGCTCTCG                                | JK05252 mutant confirmation                       |
| 133C03_down    | GACATCCTGCTGCTGTTCAA                                | JK08886 mutant confirmation                       |
| 178G02_up      | TGCTGAATCTGCAGGAACAC                                | JK12035 mutant confirmation                       |
| 35C05_up       | ATCATCAAAGTACGCACCC                                 | JK02209 mutant confirmation                       |
| 115B06_up      | CCGTATGGTACAGAATGCC                                 | JK07841 mutant confirmation                       |
| 6C12_up        | ACAGGGTAAAAGCCATGCAG                                | JK00442 mutant confirmation                       |
| 60B08_up       | TATGTGCAGGTGCTGGAAAG                                | JK03973 mutant confirmation                       |
| 76C07_down     | GTTTACCAGCAGGAATCCA                                 | JK05162 mutant confirmation                       |
| 74G02_down     | CCGTGATGCCTTGATCATTA                                | JK05048 mutant confirmation                       |
| 48H11_down     | CCGTAGCAGCTCTTCCACTC                                | JK03191 mutant confirmation                       |
| 69D9_up        | ATCCGTTTCTTTCGTGCTT                                 | JK04660 mutant confirmation                       |
| 87D5_down      | CCGGCAGTTCTTTAATCCA                                 | JK05953 mutant confirmation                       |
| G20_Arb3       | GGCCACGCGTCGACTAGTACNNNNNNNNNNCAGCA                 | transposon insertion mapping                      |
| G20_Arb5       | GGCCACGCGTCGACTAGTACNNNNNNNNNNCCGGC                 | transposon insertion mapping                      |
| Arb2           | GGCCACGCGTCGACTAGTAC                                | transposon insertion mapping                      |
| U2_comp        | CGTACGCTGCAGGTCGAC                                  | transposon insertion mapping                      |
